# Supplementary material for: A promising all-inorganic green-emitting YAGG:Ce phosphor-in-glass for laser lighting
Source: Royal Society of Chemistry journal article supplement (doi:10.1039/d2tc00612j), 2022-01-01
Supplement: d2tc00612j1.pdf [file d2tc00612j1.pdf]

## Supplementary Materials

### **A promising all-inorganic green-emitting YAGG:Ce phosphor-in-glass for laser lighting**

Luhan Wang<sup>a</sup>, Jiangdan Zhang<sup>a</sup>, Liansheng Wang<sup>a</sup>, Yueyuan Liang<sup>a</sup>, Fucai Xu<sup>b</sup>, Li Xu<sup>b</sup>, Xiaojuan Liang<sup>a,\*</sup>, Qing Chen<sup>a,\*</sup> and Weidong Xiang<sup>a,\*</sup>

<sup>a</sup>College of Chemistry and Materials Engineering, Wenzhou University, Wenzhou, 325035, PR China

<sup>b</sup>College of Life and Environmental Science, Wenzhou University, Wenzhou, 325035, PR China

\*Corresponding Authors:

E-mail: lxj6126@126.com, chenqing@iccas.ac.cn, xiangweidong001@126.com

#### **Characterizations**

The external quantum efficiency (EQE) was characterized by an intensified multi-channel photodetector (QE-2100, Otsuka Electronics, Japan) EQE, defined as the ratio of the emitted photons to the incident photons, was calculated based on the following Equation:

$$\eta_e = \frac{\text{number of photons emitted}}{\text{number of photons excited}} = \frac{\int \lambda p(\lambda) dx}{dx}$$

where  $\eta_e$  represents EQE,  $P(\lambda)$  is the emission intensity. The internal quantum efficiency ( $\eta_i$ ) is expressed as  $\eta_i = \eta_e / \varepsilon_{\text{abs}}$ , where  $\varepsilon_{\text{abs}}$  represents absorption efficiency of the sample [38]. The obtained samples had the high IQE and EQE because of the optimized glass composition and suitable sintering temperature, resulting that the phosphor can be protected well.

## Supplementary Figures

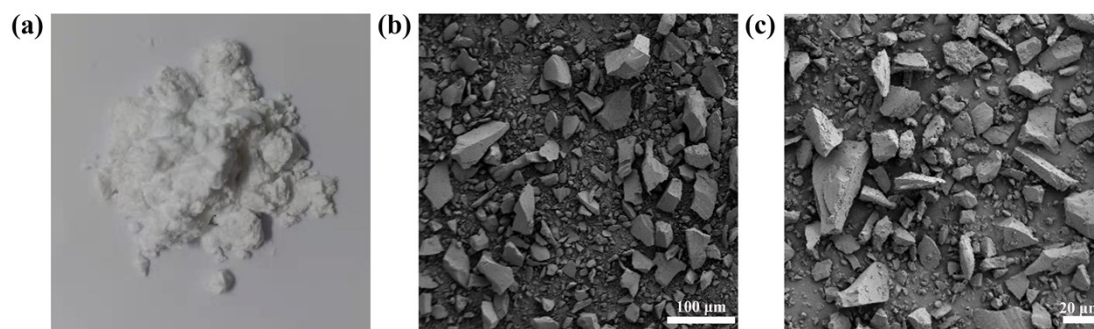

**Fig. S1** (a) Photograph of the glass powders under daylight. (b) and (c) SEM images of the glass powders.

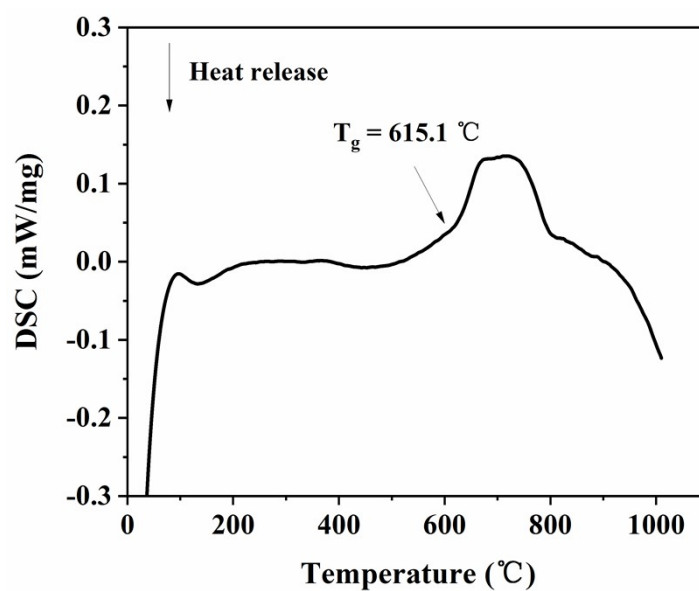

**Fig. S2** DSC curve of glass frit.

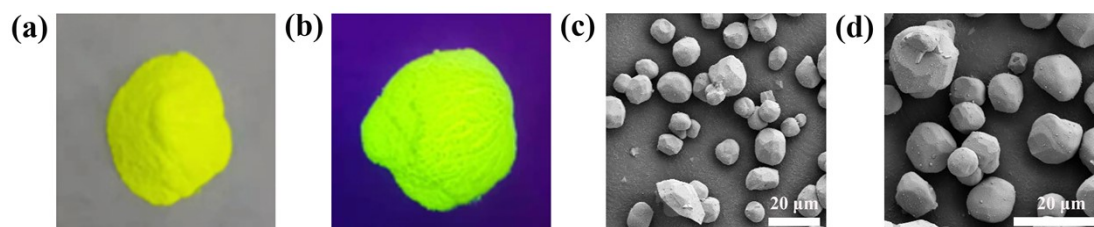

**Fig. S3** Photographs of the phosphor under daylight (a) 365 nm UV light (b). (c) and (d) SEM images of the phosphor.

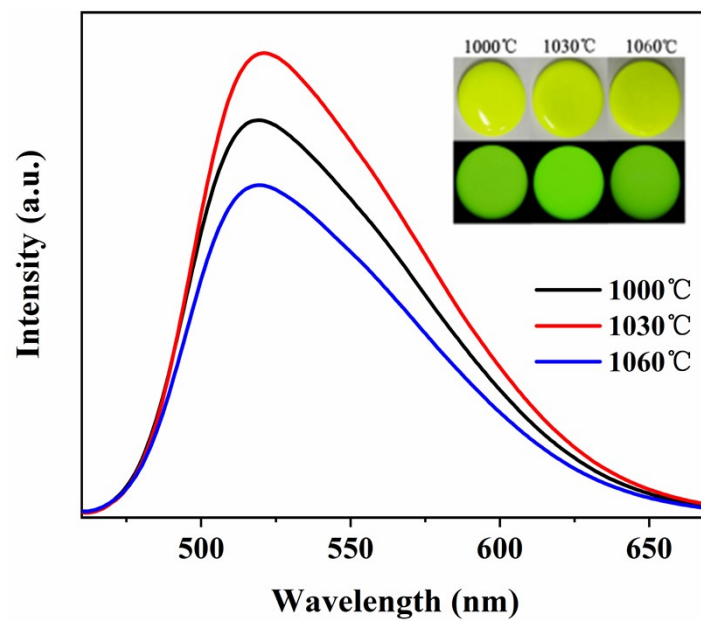

Fig. S4 PL spectra of 30 wt% PiG with various sintering temperature.

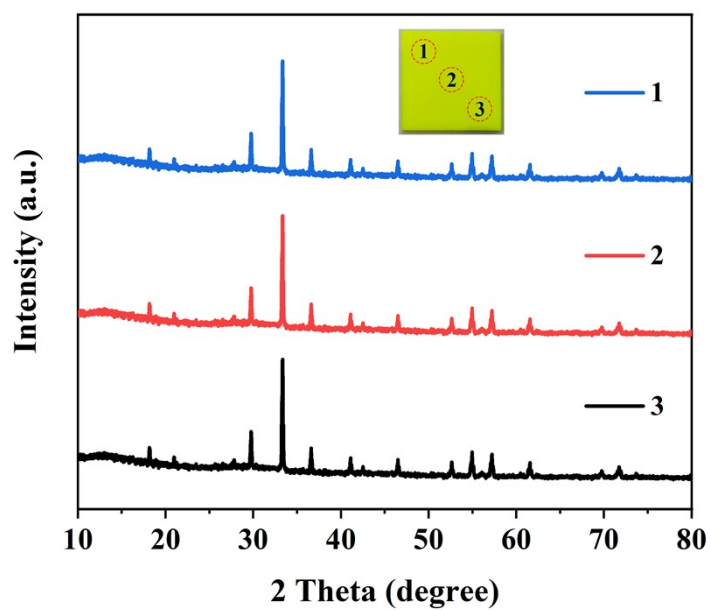

Fig. S5 XRD patterns of multiple locations within a sample.

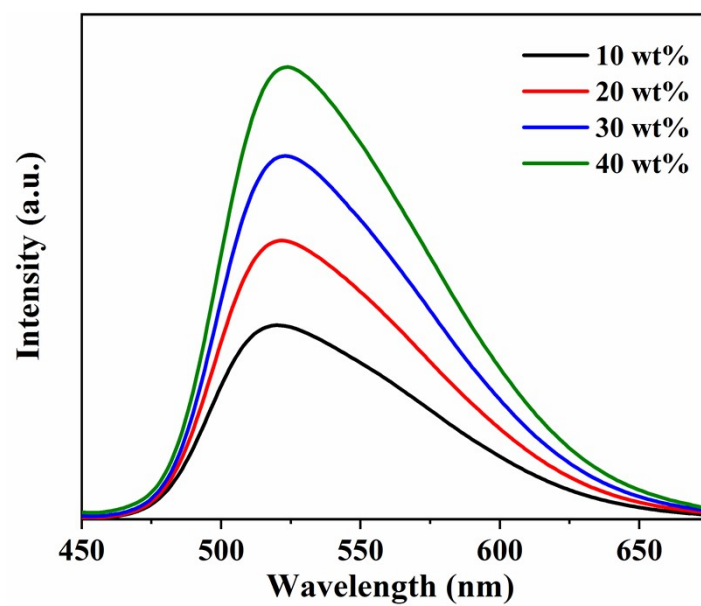

**Fig. S6** The PL spectra ( $\lambda_{\text{ex}} = 347 \text{ nm}$ ) of the samples with different phosphor concentrations.

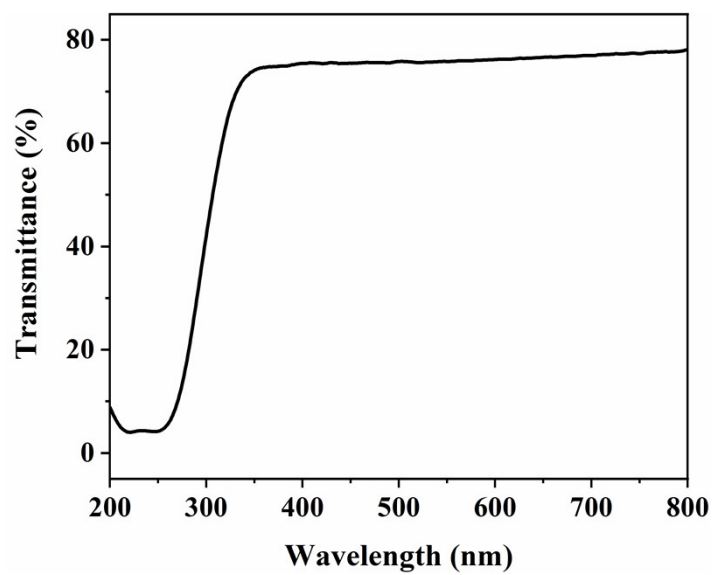

**Fig. S7** Transmittance spectrum of the precursor glass.

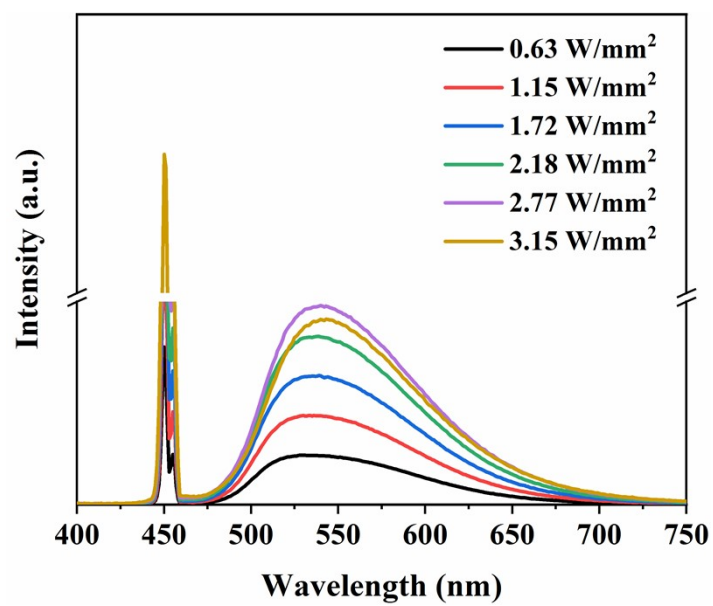

**Fig. S8** The electroluminescence (EL) emission spectra of 30 wt% PiG sample (thickness: 0.9 mm) depends on the blue laser power density.
